# Supplementary material
Source: ML conference proceedings conference paper supplement (https://openaccess.thecvf.com/content/ICCV2025/html/Chihaoui_Diffusion_Image_Prior_ICCV_2025_paper.html)
Supplement: Supplementary file 1 [file Chihaoui_Diffusion_Image_Prior_ICCV_2025_supplemental.pdf]

# Diffusion Image Prior

## Supplementary materials

### 1. Algorithm to Solve Eq. (1)

Given a degraded image  $y$  and a mapping  $g$  induced by a pre-trained diffusion. We aim to solve the optimization objective:

$$z^* = \arg \min_z \|g(z) - y\|^2, \quad \text{with} \quad x^* = g(z^*), \quad (1)$$

We adopt a similar strategy to that proposed in [1] however in contrast to [1], no specific degradation model is assumed. Rather, the focus is solely on reconstructing the original degraded image. The details of the algorithm are provided in Algorithm 1. Similarly to [1], we set  $\delta t = 100$ .

---

#### Algorithm 1 Algorithm to Solve Eq. (1)

---

**Require:** Degraded image  $y$ , learning rate  $\eta$ , step size  $\delta t$ , threshold  $\epsilon$ , diffusion steps  $T$ .  
**Ensure:** Return  $\tilde{z}$   
1: Initialize  $z \sim \mathcal{N}(\mathbf{0}, \mathbf{I})$ ,  $\hat{x}_0 = \mathbf{0}$   
2: **while**  $\|\hat{x}_0 - y\| > \epsilon$  **do**  
3:    $t = T, z_T = z$   
4:   **while**  $t > 0$  **do**  
5:      $\hat{x}_0 = (z_t - \sqrt{1 - \bar{\alpha}_t} \epsilon_\theta(z_t, t)) / \sqrt{\bar{\alpha}_t}$   
6:      $z_{t-\delta t} = \sqrt{\bar{\alpha}_{t-\delta t}} \hat{x}_0 + \sqrt{1 - \bar{\alpha}_{t-\delta t}} \cdot \frac{z_t - \sqrt{\bar{\alpha}_t} \hat{x}_0}{\sqrt{1 - \bar{\alpha}_t}}$   
7:      $t \leftarrow t - \delta t$   
8:   **end while**  
9:    $z \leftarrow z - \eta \nabla_z \|\hat{x}_0 - y\|$   
10: **end while**  
11: **return**  $z$

---

### 2. Additional Visual Comparisons

We include additional visual comparisons in Figure 1.

### References

- [1] Hamadi Chihaoui, Abdelhak Lemkhenter, and Paolo Favaro. Blind image restoration via fast diffusion inversion. *arXiv preprint arXiv:2405.19572*, 2024. 1
- [2] Jie Xiao, Ruili Feng, Han Zhang, Zhiheng Liu, Zhantao Yang, Yurui Zhu, Xueyang Fu, Kai Zhu, Yu Liu, and Zheng-Jun Zha. Dreamclean: Restoring clean image using deep diffusion prior. In *The Twelfth International Conference on Learning Representations*, 2024. 2

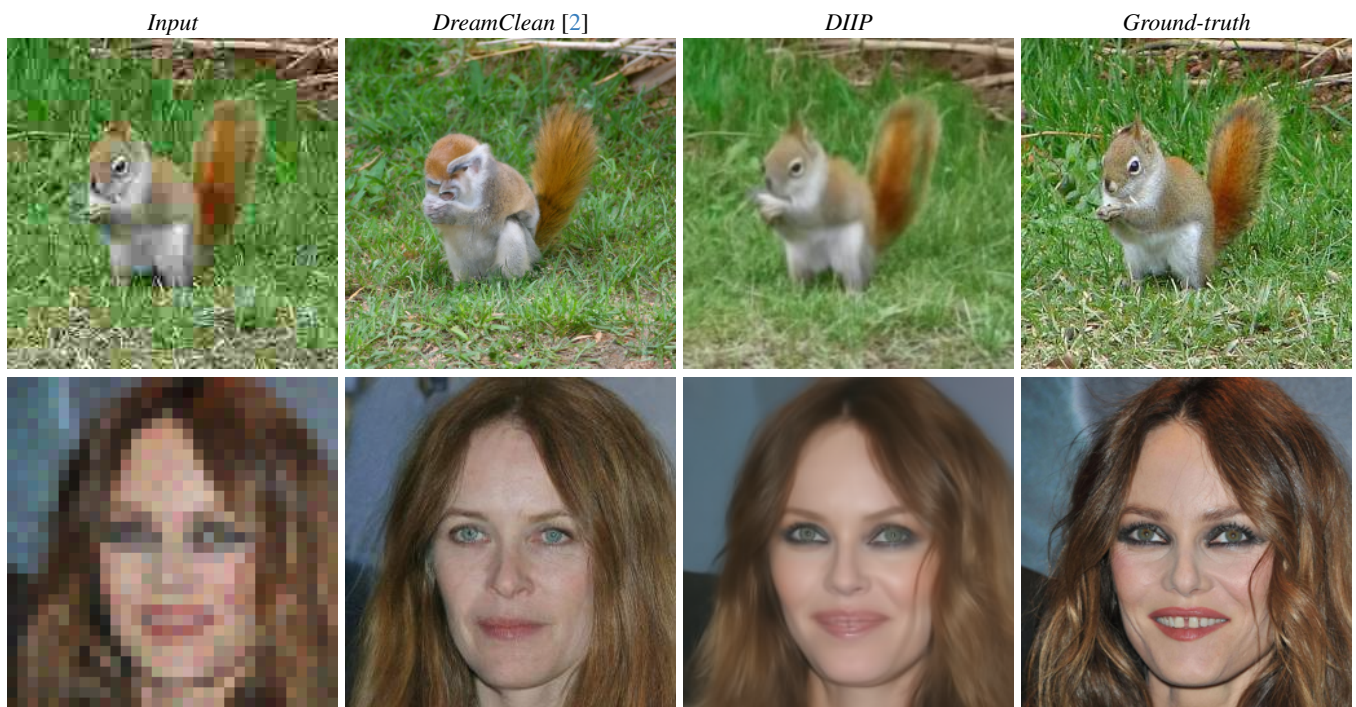

Figure 1. Visual comparisons . Top: JPEG de-artifacting. Bottom: superresolution ( $\times 4$ ).
